# Supplementary material
Source: publisher site journal article supplement (https://www.dovepress.com/article/546692)
Supplement: Supplementary file 1 [file 546692%20Supplementary.docx]

**Table S1**: Sequential patients with positive Brückner Test photos representing Isolated small-angle constant strabismus.

| AGE | race | Sex | Sound | 1VaR | 1VaL | VaR | VaL | M | P | 2 | S | i | C | J | G | b | A | √ | O | stereo | angle | SphR | CylR | axisR | SphL | CylL | axisL |
| --- | --- | --- | --- | --- | --- | --- | --- | --- | --- | --- | --- | --- | --- | --- | --- | --- | --- | --- | --- | --- | --- | --- | --- | --- | --- | --- | --- |
| 3.8 | C | F | R | 20 | 32 | 20 | 32 |  | y |  |  |  |  |  |  | y | y |  |  |  | -19 | 0 | 0 |  | 0.75 | 0 |  |
| 2.2 | C | M |  | 30 | 30 | 25 | 25 |  |  |  | y |  | y |  |  |  |  |  |  | 140 | -18 | 2.75 |  |  | 2.75 |  |  |
| 5.8 | C | F | R | 30 | 30 | 30 | 30 | y |  |  |  |  |  |  |  |  |  |  |  |  | -16 | 2.25 |  |  | 3 |  |  |
| 14.0 | C | M | L | 20 | 20 | 20 | 20 |  | y |  | y | y | y |  |  |  |  |  |  | 40 | -16 | 1 | 0.5 | 179 | 1 | 0.25 | 133 |
| 7.7 | C | M | L | 20 | 20 | 20 | 20 |  |  |  |  |  |  |  |  |  |  |  |  | 1000 | -15 | 0 | 0 |  | 0 | 0 |  |
| 5.7 | C | F | L | 40 | 40 | 40 | 40 |  |  |  |  |  | y |  |  |  |  |  |  |  | -15 | 0.5 | 0.5 | 90 | 0.5 | 0.5 | 90 |
| 3.4 | C | M | L | 25 | 20 | 25 | 20 |  |  | y |  |  | y |  |  |  |  | Y |  | 800 | -15 | 1.75 | 0 |  | 1.5 | 0 |  |
| 4.2 | H | F | R | 32 | 32 | 32 | 32 |  |  |  |  |  | y |  |  |  |  |  |  |  | -15 | 1.5 |  |  | 1.5 |  |  |
| 3.1 | C | F | R | 25 | 40 | 25 | 40 |  |  |  |  |  |  |  |  |  |  |  | y | 500 | -15 | 2.5 | 0 |  | 2.25 | 0.25 | 90 |
| 7.4 | C | F | L | 25 | 20 | 20 | 12 |  |  | y |  |  | y |  |  |  |  |  |  | 200 | -15 | 1.5 | 0.75 | 90 | 0.25 | 0 |  |
| 3.9 | C | M | R | 25 | 63 | 20 | 25 |  |  |  |  |  | y |  |  |  |  |  |  | 400 | -15 | -0.5 | 1.5 | 180 | 1 | 0 |  |
| 6.4 | C | M | L | 25 | 25 | 25 | 25 |  |  |  |  |  | y |  |  |  |  |  |  |  | -15 |  |  |  |  |  |  |
| 17.5 | PI | M | L | 80 | 25 | 30 | 20 |  |  |  |  |  |  |  |  |  |  |  |  | 200 | -14 | 1.25 | 0 | 0 | 0.5 | 0 | 0 |
| 7.0 | C | F | R | 30 | 125 | 16 | 32 |  | y |  |  |  | y |  |  |  |  |  |  | 140 | -12 | 0.25 | 0.75 | 74 | 2.5 | 0.25 | 101 |
| 3.3 | C | M | L | 25 | 30 | 25 | 30 |  |  |  |  |  | y |  |  |  |  |  |  |  | -10 | 0.25 | 0.5 | 90 | 0 | 0.25 | 90 |
| 4.3 | C | M | L | 32 | 25 | 32 | 25 |  |  | y |  |  | y |  |  |  | y |  |  | fly | -10 | 1.5 | 0 |  | 1.5 | 0 |  |
| 11.7 | PI | F | R | 16 | 40 | 16 | 40 |  | y | y |  |  |  |  |  | y |  |  |  | 800 | -10 | 0.75 | 0.25 | 99 | 1.25 | 0.25 | 80 |
| 11.7 | C | F | R | 20 | 80 | 16 | 40 |  |  |  |  |  | Y |  |  |  |  |  |  | 800 | -10 | -1.25 | 0.25 | 40 | -0.75 | 1 | 98 |
| 3.3 | C | M | R | 40 | 25 | 40 | 25 |  | y | y |  |  | y |  |  | y |  |  |  |  | -10 | 1.25 | 0.75 | 90 | 2 | 0.5 | 90 |
| 4.1 | C | M | L | 200 | 32 | 200 | 32 |  | y |  |  |  | y |  |  |  |  |  |  |  | -10 | 0.25 | 0.5 | 14 | 0.25 | 0.5 | 176 |
| 4.3 | C | M | L | 32 | 40 | 25 | 20 |  | y |  |  |  |  |  |  | y |  |  |  | 800 | -8 | 0.75 | 0.75 | 92 | 1 | 0.25 | 65 |
| 6.9 | C | M | L | 32 | 32 | 25 | 20 | y |  |  |  |  |  | y |  |  |  |  |  |  | -8 | 2.25 | 0 |  | 1.5 | 0 |  |
| 5.1 | N | M | L | 40 | 20 | 40 | 20 | y |  |  |  |  | y |  |  |  |  |  |  |  | -8 | 0.75 | 0.25 | 174 | 0.25 | 0.25 | 8 |
| 3.8 | C | F | L | 400 | 32 | 200 | 25 |  |  |  |  |  | y |  |  |  |  |  |  |  | -5 | -1 | 1 | 100 | -0.25 | 0.25 | 90 |
| 8.0 | C | M | R | 20 | 25 | 20 | 25 |  | y |  |  |  |  |  |  |  |  |  |  |  | -5 | -0.75 | 0.25 | 15 | -0.75 | 1.75 | 170 |
| 12.8 | N | M | L | 63 | 32 | 63 | 32 |  |  | y |  |  |  |  |  | y | y | Y |  | 1000 | -5 | 0.5 | 0.25 | 151 | 0.25 | 0.25 | 56 |
| 8.0 | C | M | R | 20 | 25 | 20 | 25 |  | y | y |  |  |  |  |  | y |  | Y | y | 42 | -4 | 1 | 0 | 0 | 0.5 | 0.25 | 89 |
| 5.1 | C | M | L | 30 | 25 | 30 | 25 |  | y |  |  |  |  |  |  |  |  |  |  |  | -4 | 1 | -0.25 | 84 | 0.5 | -0.25 | 98 |
| 8.4 | C | F | R | 20 | 200 | 20 | 100 |  | y | y |  |  |  |  |  | y |  |  |  | 800 | -4 | 0.5 | -0.25 | 14 | -0.25 | -0.25 | 6 |
| 4.3 | C | F | R | 30 | 30 | 20 | 25 |  |  |  |  |  |  |  |  | y | y | Y |  | 80 | 5 | 0 | 0.5 | 77 | 0.75 | 0.5 | 96 |
| 8.4 | C | M | R | 32 | 80 | 32 | 40 |  | y |  |  |  | y |  |  |  |  |  |  | 150 | 10 | -1 | 0.25 | 85 | -0.75 | 0 |  |
| 7.8 | H | F | L | 30 | 20 | 30 | 20 |  |  |  |  |  |  |  |  |  |  |  | y |  | 14 | -0.5 | 0.5 | 88 | -0.25 | 0.25 | 96 |
| 19.4 | C | F | R | 20 | 20 | 20 | 20 |  |  |  |  |  |  |  | y |  |  |  |  | 50 | -7 | -0.75 | 0.25 | 120 | -1 | 0.5 | 120 |
| 4.9 | B | F | R | csm | cs | 25 | 40 |  |  | y |  |  | y |  | y | y |  |  |  |  | -10 | 0.25 | 0 |  | 0.5 | 0 |  |

Notes: The patients had digital Bruckner phenomenon contralateral to their sound eye. 20/__ denominator for best corrected initial visual acuity right (1VaR) and left (1VaL) eyes and post-treatment visual acuity right (VaR) and acuity left (VaL) are given. Additional contemporary testing was done with MTI photoscreener (M), Plusoptix (P), Adaptica 2WIN(2), PediaVision SPOT(S), iScreen (i), Canon TX1 ( C), JVC (J), GoCheck Kids (G), Rebion blinq (b), Apple iPhone (A), PDI Check (√), or other methods including Suresight and EyeSwift. The stereo acuity from Titmus circles or PDI Check in arc seconds, and the constant strabismus distance angle in prism diopters with minus indicating an esodeviation, and a plus value indicating exotropia. Cycloplegic refraction sphere (SphR and SphL) , plus cylinder (CylR and CylL) and axis for right and left eyes are given.

**Table S2**: Prevalence Calculation from Alaska from 2003 to 2025. Various factors used to estimate a confidence interval.

| **Brückner Test DETECTED by One doctor from 2003 to 2025** | | | |
| --- | --- | --- | --- |
| # is-as (5-19) | N=34 | | |
| #is-asA (5-19 PD) | N=9 | | |
| #is-as (<15 PD) | N=23 | | |
| #is-asA (<15 PD) | N=8 | | |
| Prevalence Factor contribution | Mean | Lower | Upper |
| Alaska Cohort range | mean | low | high |
| # Alaska children at age/year | 10000 | 12000 | 8000 |
| Vision screen intensity (is-as) | 30% | 60% | 20% |
| Vision screen intensity (is-asA) | 80% | 95% | 70% |
| Cohort Strabismus | 60000 | 158400 | 28800 |
| Cohort Amblyopia | 160000 | 250800 | 100800 |
| Alaska pediatric ophthalmologists | 2.5 | 2 | 3 |
| Prevalence of is-as (5-19 PD) | 0.142% | 0.043% | 0.354% |
| Prevalence of is-asA (5-19 PD) | 0.014% | 0.007% | 0.027% |
| Prevalence of is-as (<15 PD) | 0.096% | 0.029% | 0.240% |
| Prevalence of is-asA (<15 PD) | 0.013% | 0.006% | 0.024% |

**Notes**: “Upper” represents the conservative estimate. Sequential digital images of Brückner Test are categorized as isolated small-angle strabismus (is-as) all between 5 and 19 prism diopters (PD) and those less than 15 PD (<15 PD).. Also listed are cases with isolated small-angle strabismic amblyopia (is-asa) worse than 20/40. Alaska pediatric population and vision screening detection rates taken from state, school and Alaska Blind Child Discovery (www.ABCD-Vision.org) data.
